# Supplementary material for: Effect of the Combination of Clostridium butyricum and Mycelium of Phellinus igniarius on Intestinal Microbiota and Serum Metabolites in DSS-Induced Colitis
Source: MDPI journal article supplement (doi:10.3390/nu16010153), 2024-01-02
Supplement: s1 [file s1]

Article

# Effect of the Combination of *Clostridium butyricum* and Mycelium of *Phellinus igniarius* on Intestinal Microbiota and Serum Metabolites in DSS-induced Colitis

Rou Zhao<sup>1</sup>, Qiaoyi Zhang<sup>2</sup>, Ting Huang<sup>2</sup>, Yun Tian<sup>2</sup>, Guiping Guan<sup>2</sup>, Yuanshan Lin<sup>1,\*</sup>

<sup>1</sup> College of Bioscience and Biotechnology, Hunan Agricultural University, Changsha, China

<sup>2</sup> Agricultural Bioengineering Institute, Changsha, China

\* Correspondence: Wallslin@hunau.edu.cn; Tel.: +86 -139-7487 -6598

## 1. Effects of CB, MPI, and CON on colon length in colitis mice

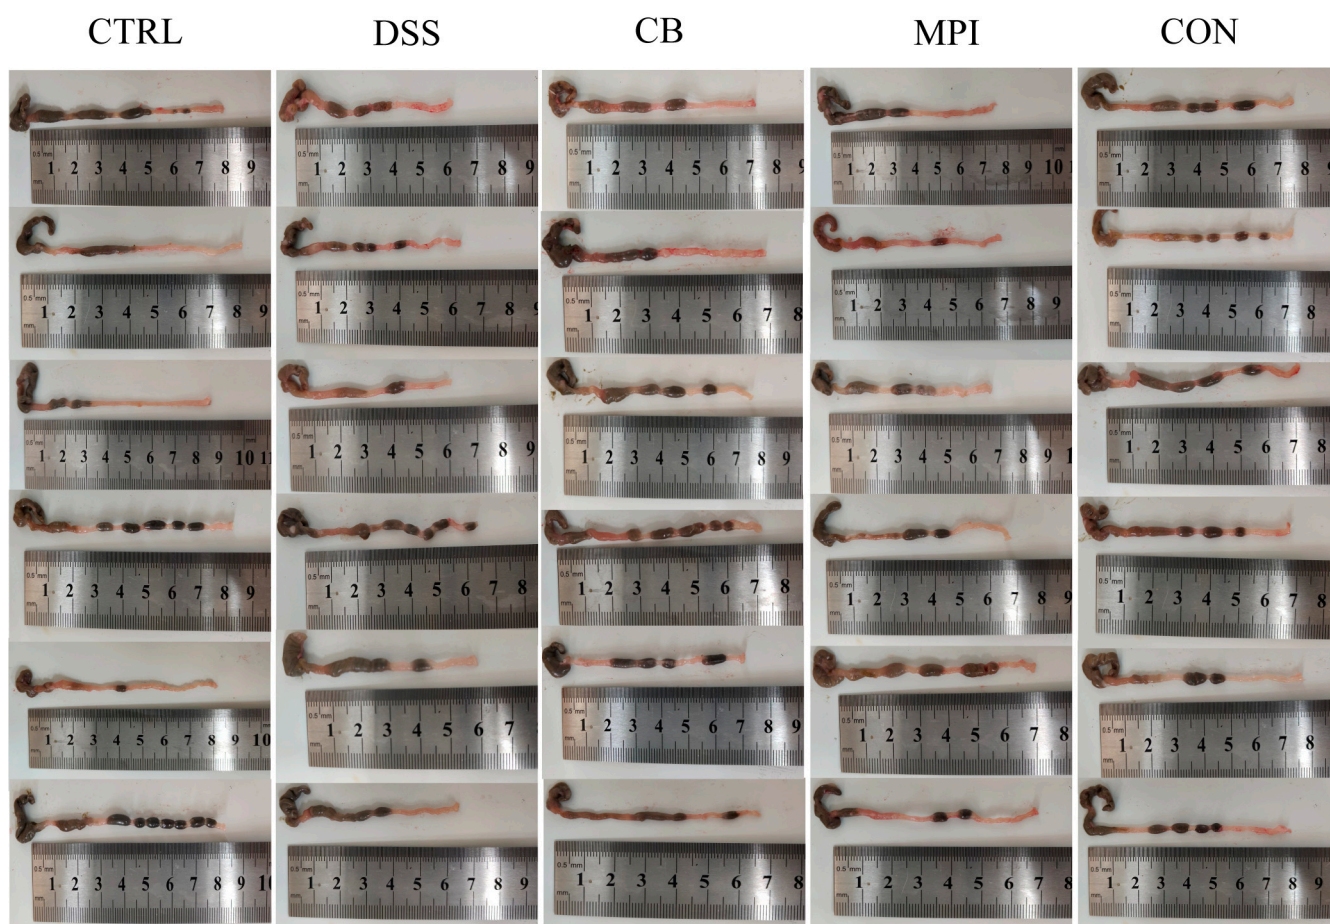

Supplementary Figure S1. Comparison of colon length in each group of mice.

2. Histological scoring criteria for colon sections

16

Supplementary Table S1. Histological scoring criteria for colon sections17

| Feature graded             | Score | Description                             |
|----------------------------|-------|-----------------------------------------|
| Inflammation               | 0     | None                                    |
|                            | 1     | Minimal                                 |
|                            | 2     | Mild                                    |
|                            | 3     | Moderate                                |
|                            | 4     | Severe                                  |
| Extent of injury           | 0     | None                                    |
|                            | 1     | Mucosal                                 |
|                            | 2     | Mucosal and submucosal                  |
|                            | 3     | Transmural                              |
|                            | 4     | Chorion layer                           |
| Crypt damage               | 0     | None                                    |
|                            | 1     | Basal 1/3 damaged                       |
|                            | 2     | Basal 2/3 damaged                       |
|                            | 3     | Only the surficial epithelium is intact |
|                            | 4     | The entire crypt and epithelium lost    |
| Extent of section affected | 0     | 0                                       |
|                            | 1     | 1%-25%                                  |
|                            | 2     | 26%-50%                                 |
|                            | 3     | 51%-75%                                 |
|                            | 4     | 76%-100%                                |

3. Detailed ELISA kit information

18

Supplementary Table S2. Detailed ELISA kit information19

| Kit name            | Detection range | Manufacturing or marketing company  | Country | Kit lot number |
|---------------------|-----------------|-------------------------------------|---------|----------------|
| IL-4 detection kit  | 10-240 pg/mL    | Jiangsu MeiMian Industrial Co., Ltd | China   | 20230507M      |
| IL-6 detection kit  | 3-120 pg/mL     | Jiangsu MeiMian Industrial Co., Ltd | China   | 20230507M      |
| IL-10 detection kit | 30-1000 pg/mL   | Jiangsu MeiMian Industrial Co., Ltd | China   | 20230507M      |
| TNF-α detection kit | 25-800 ng/L     | Jiangsu MeiMian Industrial Co., Ltd | China   | 20230507M      |
| MPO detection kit   | 1-40 ng/L       | Jiangsu MeiMian Industrial Co., Ltd | China   | 20230507M      |
| SOD detection kit   | 1-50 pg/mL      | Jiangsu MeiMian Industrial Co., Ltd | China   | 20230507M      |

#### 4. Effects of CB, MPI, and CON on the alpha diversity of colon microorganisms in mice

21

**Supplementary Table S3.** Effects of CB, MPI, and CON on the alpha diversity of colon microorganisms in mice

22

| Index         | CTRL           | DSS             | CB             | MPI            | CON            |
|---------------|----------------|-----------------|----------------|----------------|----------------|
| ACE           | 430.47 ± 56.38 | 327.07 ± 42.62* | 318.18 ± 68.02 | 305.76 ± 50.21 | 257.47 ± 36.13 |
| Chao 1        | 429.37 ± 56.35 | 326.13 ± 42.48* | 317.01 ± 67.79 | 304.25 ± 50.09 | 256.60 ± 35.98 |
| Simpson       | 0.97 ± 0.01    | 0.95 ± 0.03     | 0.94 ± 0.17    | 0.96 ± 0.02    | 0.96 ± 0.02    |
| Shannon       | 6.65 ± 0.23    | 6.17 ± 0.67     | 5.77 ± 0.47    | 6.15 ± 0.51    | 5.88 ± 0.54    |
| PD_whole_tree | 32.78 ± 3.63   | 27.22 ± 2.40    | 27.80 ± 5.04   | 26.66 ± 3.95   | 23.27 ± 1.74   |

Compared to CTRL group, \* $p < 0.05$ .

23

24

25

26

27

28

29

5. Effects of CB, MPI, and CON on serum differential metabolites in mice with colitis

30

Supplementary Table S4. Differential metabolites in serum

31

| Metabolite                   | m/z    | CTRL vs DSS |      |           | DSS vs CB |      |           | DSS vs MPI |      |           | DSS vs CON |      |           |
|------------------------------|--------|-------------|------|-----------|-----------|------|-----------|------------|------|-----------|------------|------|-----------|
|                              |        | log2FC      | VIP  | Regulated | log2FC    | VIP  | Regulated | log2FC     | VIP  | Regulated | log2FC     | VIP  | Regulated |
| Dihydronaringenin-O-sulphate | 353.03 | -1.73       | 1.98 | ↓         | 2.17      | 2.81 | ↑         | 0.46       | 0.70 | /         | 1.23       | 1.76 | ↑         |
| Dodecenoylcarnitine          | 376.23 | -0.31       | 1.87 | ↓         | 0.32      | 2.37 | ↑         | 0.21       | 1.39 | /         | 0.45       | 1.91 | ↑         |
| Docosanedioic acid           | 369.30 | 0.63        | 2.13 | ↑         | 0.09      | 0.44 | /         | -0.97      | 2.38 | ↓         | -0.50      | 1.89 | ↓         |
| N-Palmitoylsphingosine       | 576.50 | -0.49       | 1.06 | /         | 0.41      | 2.22 | ↑         | 0.46       | 2.06 | ↑         | 0.46       | 1.60 | ↑         |
| Pitavastatin                 | 466.17 | 0.41        | 2.03 | ↑         | -0.17     | 0.11 | /         | -0.29      | 1.57 | /         | -0.55      | 1.67 | ↓         |
| Aconitic acid                | 173.01 | -0.18       | 1.25 | /         | -0.36     | 2.14 | ↓         | -0.73      | 2.27 | ↓         | -0.36      | 1.68 | ↓         |
| Citric acid                  | 191.02 | -0.11       | 1.16 | /         | -0.45     | 2.49 | ↓         | -0.67      | 2.36 | ↓         | -0.48      | 1.94 | ↓         |
| Guanosine                    | 301.13 | -0.53       | 1.27 | /         | -0.71     | 2.54 | ↑         | 0.59       | 1.97 | ↑         | 0.59       | 1.69 | ↑         |
| (6Z)-Oct-6-enediolcarnitine  | 629.33 | -0.46       | 1.72 | ↓         | 0.10      | 0.62 | /         | 0.26       | 1.33 | /         | 0.39       | 1.63 | ↑         |
| 1-Octadecanethiol            | 331.27 | 0.76        | 1.98 | ↑         | -0.34     | 1.41 | /         | -0.40      | 1.49 | /         | -0.94      | 1.67 | ↓         |
| L-Urobilinogen               | 561.36 | 0.12        | 0.36 | /         | -1.09     | 2.25 | ↓         | -1.15      | 1.86 | ↓         | -1.56      | 1.78 | ↓         |
| Tilmicosin                   | 886.61 | -1.49       | 1.71 | /         | -3.72     | 2.32 | ↓         | -3.85      | 1.95 | ↓         | -3.99      | 1.73 | ↓         |
| Diethyl Phthalate            | 413.27 | 0.25        | 1.70 | /         | 0.21      | 2.26 | ↑         | 0.29       | 2.43 | ↑         | 0.30       | 2.08 | ↑         |
| 3-oxocholest-4-en-26-oate    | 414.31 | 0.81        | 1.63 | ↑         | -0.33     | 1.15 | /         | -0.44      | 1.27 | /         | -0.98      | 1.59 | ↓         |
| 3-Keto-4-methylzymosterol    | 361.32 | 0.88        | 1.68 | ↑         | -0.69     | 1.89 | /         | -0.60      | 1.62 | /         | -1.14      | 1.87 | ↓         |

CTRL vs DSS, the control group compared with the DSS group; DSS vs CB, the DSS group compared with the CB group; DSS vs MPI, the DSS group compared with the MPI group; DSS vs CON, the DSS group compared with the CON group. Fold change (FC), indicates the ratio of average metabolite levels between the groups. VIP, variable importance in projection. ↑ / ↓, increase/decrease, /, no changes. The screening criteria for differential metabolites were set at VIP > 1.50 and  $p < 0.05$ .

32  
33  
34
